1                   **Modular development enables rapid design of media for alternative hosts**

2  
3  
4  
5 Andrew M. Biedermann<sup>1,2</sup>, Isabella R. Gengaro<sup>1,2</sup>, Sergio A. Rodriguez-Aponte<sup>2,3</sup>, Kerry R.  
6 Love<sup>1,2</sup>, J. Christopher Love<sup>1,2</sup>

7  
8  
9  
10 <sup>1</sup>Department of Chemical Engineering, Massachusetts Institute of Technology, Cambridge,  
11 Massachusetts 02139, United States

12 <sup>2</sup>The Koch Institute for Integrative Cancer Research, Massachusetts Institute of Technology,  
13 Cambridge, Massachusetts 01239, United States

14 <sup>3</sup>Department of Biological Engineering, Massachusetts Institute of Technology, Cambridge,  
15 Massachusetts 02139, United States

16  
17  
18  
19  
20  
21  
22  
23  
24 \*Correspondence to: [clove@mit.edu](mailto:clove@mit.edu)

25  
26  
27  
28  
29  
30 Target journal: Biotechnology & Bioengineering  
31 Article (<15 double-spaced pages of text and no more than 10 figures/tables)

32  
33 **Keywords:** Media development; media blending; *Pichia pastoris*; alternative hosts; automation  
34

35

36 **Abstract**

37           Developing media to sustain cell growth and production is an essential and ongoing  
38 activity in bioprocess development. Modifications to media can often address host or product-  
39 specific challenges, such as low productivity or poor product quality. For other applications,  
40 systematic design of new media can facilitate the adoption of new industrially relevant  
41 alternative hosts. Despite manifold existing methods, common approaches for optimization often  
42 remain time and labor intensive. We present here a novel approach to conventional media  
43 blending that leverages stable, simple, concentrated stock solutions to enable rapid  
44 improvement of measurable phenotypes of interest. We applied this modular methodology to  
45 generate high-performing media for two phenotypes of interest: biomass accumulation and  
46 heterologous protein production, using high-throughput, milliliter-scale batch fermentations of  
47 *Pichia pastoris* as a model system. In addition to these examples, we also created a flexible  
48 open-source package for modular blending automation on a low-cost liquid handling system to  
49 facilitate wide use of this method. Our modular blending method enables rapid, flexible media  
50 development, requiring minimal labor investment and prior knowledge of the host organism, and  
51 should enable developing improved media for other hosts and phenotypes of interest.

## 52 Introduction

53 Achieving high volumetric productivities of biologic drugs in cultivation is a key step in  
54 advancing candidate biologic drugs. The outcome of this effort ultimately impacts  
55 manufacturing costs as well as readiness for transitioning clinical-stage development (Love,  
56 Love, & Barone, 2012). The development of standard, chemically defined media for established  
57 manufacturing hosts, such as CHO, has made such transitions efficient for monoclonal  
58 antibodies by achieving high biomass accumulation, cell viability, operational consistency, and  
59 specific productivities, streamlining development efforts (McGillicuddy, Floris, Albrecht, &  
60 Bones, 2018; Rodrigues, Costa, Henriques, Azeredo, & Oliveira, 2012). Nonetheless, optimizing  
61 productivity or quality attributes for a specific product often still requires further refinement of  
62 media (Ritacco, Wu, & Khetan, 2018). Such development may require evaluating dozens of  
63 variants derived from a common standard formulation to address the specific challenges  
64 encountered (Gagnon et al., 2011; Loebrich et al., 2019). Media development for entirely new  
65 biomanufacturing technologies, such as alternative hosts (Matthews, Kuo, Love, & Love, 2017a)  
66 or new product modalities (Lu et al., 2016), may also require new formulations or extensive  
67 optimizations due to limited prior knowledge.

68 Common approaches to develop a medium to optimize a phenotype of interest are often  
69 labor intensive, low throughput, or rely heavily on extensive analytical capacity (Galbraith,  
70 Bhatia, Liu, & Yoon, 2018). For example, analysis of residual media after cultivation requires  
71 extensive capabilities for analytical characterization and prior experience with the manufacturing  
72 host to identify potentially limiting or toxic media components (Mohmad-Saberi et al., 2013;  
73 Pereira, Kildegaard, & Andersen, 2018). As a result, optimizations can be slow and iterative.  
74 Furthermore, for an alternative host such as *Komagataella phaffii* (formerly known as *Pichia*  
75 *pastoris*), there is substantially less, if any, prior knowledge available to establish profiles for  
76 residual components in media after fermentation. Other analytical techniques like RNA-seq  
77 combined with methods for reporter metabolite analysis can guide media optimization, to

78 generate testable hypotheses regarding beneficial modifications to media (Matthews et al.,  
79 2017a). Such genome-scale approaches, however, require prior host-specific knowledge, such  
80 as well-annotated genomes, and are still limited by slow iteration and labor-intensive  
81 preparations of new media to test the hypotheses generated from computational analyses.

82         Alternative strategies for blending basal components for media allow linear combinations  
83 of existing media to explore many variations rapidly (Jordan, Voisard, Berthoud, & Tercier,  
84 2013). While this approach avoids slow iterative analyses, the typical experiment is labor  
85 intensive to perform, often requiring independent preparations of over a dozen stock media to  
86 combine (Rouiller et al., 2013). Similar to analytical-based approaches for optimization, the  
87 selected variations of media are simultaneously guided and constrained by prior experience and  
88 media designs, which may limit the breadth of components examined (Kennedy & Krouse,  
89 1999). For less established hosts with fewer available formulations of media, media blending  
90 may also require fully *de novo* formulations for initial studies. Further complicating such designs,  
91 different and new components for media can present challenges in solubility or unanticipated  
92 interactions with other elements in the formulations (Ritacco et al., 2018). New approaches to  
93 blending could, however, enable fast, flexible experimentation and minimize the time, labor, and  
94 analytical development needed initially to optimize media for new applications and phenotypes.

95         Here, we present a novel and generalizable approach for the modular development of  
96 media and demonstrate its use to create optimized media for two different phenotypes—cellular  
97 growth and recombinant expression of a protein (as measured by the secreted heterologous  
98 protein titer) from *Pichia pastoris*. Our approach comprises two modular parts for blending and  
99 optimization. We determined that a set of simple concentrated stock solutions constructed in  
100 defined modules could generate many media by blending or dilution. We then automated a  
101 simple, inexpensive liquid handling system (Opentrons OT-2) to enable high-throughput  
102 screening for the effects of diverse media on a phenotype of interest in milliliter-scale batch  
103 cultures. To maximize the benefit of this automated blending, we also developed an algorithmic

104 framework for systematic modular media optimization, beginning from a simple minimal media  
105 (here a YNB-based one). This framework provides insights pertaining to key media components  
106 during stages of optimization, as well as overall mapping of the design space for the media. In  
107 the examples presented here, the resulting defined media developed with this strategy  
108 outperformed commonly used BMGY and BMMY complex formulations for biomass  
109 accumulation and secreted heterologous protein production.

110

## 111 **Materials and Methods**

### 112 *Strains and cultivation conditions*

113 Media for evaluating biomass accumulation were developed using a previously  
114 described strain expressing G-CSF under control of the pAOX1 promoter (Crowell et al., 2020).  
115 24-well plate screens were conducted as described previously, except cells were grown on a  
116 labForce shaker and were only sampled 24 hours after inoculation (Matthews et al., 2017a).  
117 BMGY, BMMY, and RDM media were formulated as described previously for shake flasks  
118 (Matthews et al., 2017a). All cultivations were inoculated from a working cell bank at an initial  
119 cell density of 0.1 OD/mL. For each working cell bank, cells grown in 1 L shake flasks with a 200  
120 mL working volume of RDM were harvested during exponential growth (4-5.5 OD/mL) via  
121 centrifugation at 1500 rcf for 4 minutes at 23 °C and resuspended in an equal volume mixture of  
122 RDM and 50 v/v% glycerol. This mixture was then distributed into 700 µL aliquots and stored at  
123 -80 °C, resulting in a cell density of ~30 OD/mL for the cell bank.

124 Media for evaluating enhanced production were developed using a strain expressing a  
125 rotavirus-derived subunit vaccine candidate, P[8], under the control of the pAOX1 promoter  
126 described previously (Dalvie et al., 2020). Biomass accumulation proceeded for 24 hours; cells  
127 reached an initial induction density of ~20 OD/mL. Cultures were then exchanged into  
128 production media and allowed to produce protein for an additional 24 hours. Supernatant was  
129 harvested by centrifugation at 1500 rcf for 4 minutes at 23 °C and filtered using a Captiva 96

130 well 0.2  $\mu\text{m}$  filter plate (Agilent Technologies, Santa Clara, CA) prior to titer measurement by  
131 RP-UHPLC.

132 Media components and supplements were purchased from Sigma-Aldrich, St. Louis,  
133 MO, unless otherwise indicated in the supporting information. A table of supplement and stock  
134 solutions with screening concentrations is also included in the supporting information. During  
135 modular optimization, all media were prepared in high throughput using an Opentrons OT-2  
136 liquid handler (Opentrons, Brooklyn, NY, software version  $\geq 3.16.1$ ) using Openblend. Modular  
137 media blending code and instructions for setup and operation are provided in the Openblend  
138 package ([https://github.com/abiedermann/openblend\\_public](https://github.com/abiedermann/openblend_public)). For consistency, media used in  
139 final head-to-head comparisons were prepared in bulk and filter sterilized through a 0.2  $\mu\text{m}$   
140 benchtop filter.

141

#### 142 *Analytical procedures*

143 Biomass was measured by optical density at 600 nm as described previously (Matthews  
144 et al., 2017a). An Agilent Bravo liquid handler was used to dilute samples prior to  
145 measurements of OD into the Tecan Infinite M200 Pro plate reader.

146 Reverse phase ultra-high performance liquid chromatography (UHPLC) analysis was  
147 performed on Agilent 1290 Infinity II UHPLC system controlled using OpenLab CDS software  
148 (Agilent Technologies, Santa Clara, CA). The concentration of protein was determined using a  
149 Poroshell 120 SB-Aq column (2.1 x 50 mm, 1.9 $\mu\text{m}$ ) operated at 1.0 mL/min and 70 °C (Agilent  
150 Technologies, Santa Clara, CA). Buffer A was 0.1% (v/v) TFA in water and buffer B was 0.1%  
151 (v/v) TFA, 0.5% (v/v) water in ACN. A gradient was performed as follows: 30% B for 1 min., 30-  
152 40% B over 3 min., 40-90% B over 0.5 min., 90% B for 0.5 min., 90-30%B over 0.5 min., and  
153 30% for 1 min.; total method run time was 6.5 minutes. Sample injection volumes were 50 $\mu\text{L}$ . A  
154 diode array detector was set for absorbance detection at 214nm. Data analysis was completed  
155 using OpenLab CDS Data Analysis (Agilent Technologies, Santa Clara, CA).

156 Statistical analysis and DOE design was conducted using JMP (SAS Institute, Cary NC).  
157 Quadratic models were fitted using effect screening and non-significant terms (adjusted p-value  
158 > 0.01) were eliminated sequentially in order of decreasing adjusted p-value to avoid overfitting.  
159 Data was plotted using Prism 8.4.0 (GraphPad Software, San Diego, CA).

160

161

162

## 163 **Results**

### 164 *Design of approach for modular media blending*

165 We sought to develop an approach capable of identifying important, beneficial  
166 modifications for media tailored to a given phenotype of interest. We reasoned that key  
167 requirements for such an approach would be that it is fast and automatable, with minimal  
168 dependence on complex analytical assay development. Such features would enable routine  
169 application to any measurable phenotype of interest. In general, media blending allows both  
170 speed and low analytical complexity. We aimed to retain these features while minimizing the  
171 labor and constraints on compositions imposed by linear combinations of fully formed and  
172 unique media. We reasoned that diverse and flexible blends of media could be created by  
173 defining simple concentrated stock solutions as basic modules to combine further. These  
174 modules would comprise individual components or common subsets of components with  
175 compatible solubilities (e.g. YNB). If media components could be formulated in concentrated  
176 stock solutions that could be stored stably over time, then the components could be routinely  
177 and interchangeably combined and diluted to the desired final concentrations. This approach  
178 would yield a broadly applicable modular strategy for media blending amenable to conventional  
179 liquid handling automation.

180 To test the feasibility of this approach, we first assessed whether many common media  
181 components could be formulated in concentrated stable aqueous stock solutions. Using the

182 CHO medium eRDF as a reference, we estimated the solubility of each component of this  
183 medium, using data from AqSolDB as well as other online sources (Combs, 2012; FSA Panel  
184 on Additives and Products or Substances used in Animal Feed (FEEDAP), 2011; Ritacco et al.,  
185 2018; Schnellbaecher, Binder, Bellmaine, & Zimmer, 2019; Sorkun, Khetan, & Er, 2019;  
186 Yamamoto & Ishihara, n.d.). We compared the estimated solubility of each media component to  
187 its concentration in eRDF and found that, individually, most media components are soluble at  
188 levels >10x higher than their eRDF concentration (**Figure 1A**). The existence of a wide range of  
189 commercially available concentrated supplements further supports this result: >50x  
190 concentrated solutions of amino acids, vitamins, lipids, and trace metal supplements are  
191 common and commercially available.

192 Next, we used the product information of commercially available supplements, literature  
193 sources, and inspection to estimate the percentage of eRDF media components that could be  
194 stored in stable solutions for >6 months. We estimated that over 75% of eRDF components met  
195 this criterion (**Figure 1B**). To address stability challenges caused by less stable components,  
196 we reasoned that less stable components or supplements, such as vitamins, could be prepared,  
197 aliquoted, and stored frozen for long-term storage (Schnellbaecher et al., 2019); these aliquots  
198 could then be thawed and used within a defined period to mitigate component instability and  
199 enable their integration into our modular blending strategy. Together, these solubility and  
200 stability data suggested that a modular approach to media development could be defined in this  
201 way to accommodate a range of new formulations easily.

202 We next automated the process for constructing media, using the Opentrons OT-2. We  
203 chose this liquid handler due to its low cost, reliability, and compatibility with simple formats for  
204 data input, such as Excel spreadsheets. We then created an open-source Python package,  
205 named Openblend, which simplified the media construction process by handling routine  
206 experimental design and execution steps (Figure 1C). Openblend creates an experimental  
207 design spreadsheet, specifying the number of 24 well plates, the desired media composition of



208 each well, and stock solution names and concentrations. The script then checks the feasibility  
209 of the experimental design, ensuring that the total volume of each well will not exceed the target  
210 volume and avoiding the addition of sub-microliter stock solution volumes. If the design passes  
211 this assessment, the script then outputs a new spreadsheet containing the setup for the OT-2  
212 deck and required volumes of stock solutions, providing a user with instructions on how to setup  
213 the OT-2 liquid handler. We found that our typical time to execute this script, setup the OT-2  
214 and initiate plate building was ~15 minutes, and the time for the automated steps was about two  
215 hours.

216 Finally, we defined a modular approach for optimization to effectively leverage the  
217 Openblend tool (**Figure 1D**). Beginning from an initial basal medium, improved media are  
218 constructed through successive rounds of optimization. In each round, a library of media  
219 components and supplements are screened to identify beneficial additives. These additives are  
220 then screened in combination and over a range of concentrations to further optimize the  
221 performance of the medium. Each modular addition and optimization of additives can be guided  
222 simply by measurements of the phenotype of interest (e.g. biomass accumulation). This greedy  
223 approach to multi-dimensional optimization could continue iteratively until the resulting media  
224 met desired specifications, all available media components were explored, or no additional  
225 gains in performance realized.

226

### 227 *Application to Developing a Medium for Biomass Accumulation*

228 To assess the utility of this blending-based approach, we next aimed to identify and  
229 optimize the concentration of media components beneficial for rapid biomass accumulation of *P.*  
230 *pastoris* in batch cultivation. We previously described a rich defined medium (RDM) (Matthews  
231 et al., 2017a), capable of high growth rates during biomass accumulation. One challenge  
232 encountered with this formulation, however, was that precipitates can form at higher pH values  
233 that require filtering during bulk preparations. Nonetheless, this medium provided a relevant

234 comparison for assessing the medium realized with our new approach due to its prior  
235 demonstrated benefits relative to complex media. Following our modular approach, we  
236 improved biomass accumulation by optimizing the accumulated optical density at 600 nm after  
237 24 hours of cultivation.

238 Algorithms for optimizing systems based on multiple dimensions are often sensitive to  
239 initial conditions used (Zakharova & Minashina, 2015). Given this potential confounding effect  
240 here, we tested first the effects of the types of carbon source, nitrogen source, and pH set point  
241 on biomass accumulation, using 1x YNB without amino acids or ammonium sulfate (YNB) to  
242 satisfy minimum requirements for the concentrations of trace elements. We conducted a full-  
243 factorial DOE using glycerol, glucose, and fructose as carbon sources; urea and ammonium  
244 sulfate as nitrogen sources; and potassium phosphate as a buffer with pH values of 5, 5.75, and  
245 6.5. We selected initial concentrations of 40 g/L, 4 g/L urea or the N-mol equivalent for  
246 ammonium sulfate, and 10 g/L potassium phosphate, similar to values used in other media for  
247 *Pichia pastoris* (Matthews et al., 2017a). A least squares regression model, including individual,  
248 combination, and quadratic effects was fit to the log of optical density after 24 hours, a proxy  
249 variable for the average growth rate ( $R^2 = 0.81$ ). We determined that the two most significant  
250 model terms were the type of carbon source and the interaction of the nitrogen source with pH  
251 (**Figure 2A**). We found that cells grew significantly faster on metabolically related sugars  
252 (glucose and fructose) than on the polyol (glycerol) commonly used for *Pichia* during biomass  
253 accumulation (**Figure 2B**). This result affirms prior reports where glucose has been used for  
254 biomass accumulation of *Pichia* (Guo et al., 2012; Moser et al., 2017).

255 The model also suggested that poor biomass accumulation during cultivation resulted  
256 from a combination of ammonium sulfate as a source of nitrogen with low buffer pH (**Figure**  
257 **2B**). This outcome may result from the production of acidic species associated with cellular  
258 ammonium metabolism in the batch cultivation (Villadsen, 2015). Interestingly, the model  
259 indicated slightly greater biomass was achieved with urea instead of ammonium sulfate. The

260 biomass accumulation of cultures grown with urea as a source of nitrogen were less sensitive to  
261 reduced pH values (~5). We observed, however, that cultivations at pH 5 showed extensive  
262 flocculation compared to those at 6.5. Given the insensitivity of urea-fed cultivations to buffer  
263 pH and the high solubility and potential for low-cost sourcing of fructose, we therefore chose to  
264 include fructose, urea, and a potassium phosphate buffer with a pH of 6.5 in our initial media  
265 formulation.

266 With this basal formulation determined, we next screened for concentration-dependent  
267 interactions of other key additives to the media and then optimized concentration-dependent  
268 parameters. Following the same approach for screening effects, we conducted a full factorial  
269 DOE over a broad range of media component concentrations: YNB (0.5, 1, 2x), fructose (10, 30,  
270 50 g/L), urea (1, 4, 7 g/L), and potassium phosphate adjusted to a pH of 6.5 (4, 10, 16 g/L). The  
271 resulting model identified fructose as a concentration-sensitive parameter ( $R^2=0.73$ ) (**Figure**  
272 **2D**). Terms involving the concentration of YNB were also highly ranked, but not statistically  
273 significant. No significant interactions between components were identified in the model. We  
274 therefore sought to better understand the concentration dependence of fructose and YNB  
275 independently (**Figure 2E**), over an 8-fold range of concentrations. As expected, biomass  
276 accumulation was highly sensitive to fructose concentration, with an optimum around 22.5 g/L of  
277 fructose. The concentration of YNB had minimal effect on biomass accumulation; the presence  
278 of trace elements supplied by YNB, however, was essential to growth. Based on these results,  
279 we chose concentrations of 22.5 g/L fructose, 1x YNB, 7 g/L urea, and 10 g/L potassium  
280 phosphate buffer. We reasoned that although biomass accumulation was relatively insensitive  
281 to the concentrations of YNB and urea, higher concentrations could provide improved media  
282 depth in future applications. We named this basal formulation DM1\_dev0.

283 We next assessed what additional media components could improve biomass  
284 accumulation. To test over 60 different components individually would require over 60 individual  
285 solutions. Such an approach would scale linearly with new components; instead, we chose to

286 screen groups of related components, using commercially available pre-mixed supplements. We  
287 compiled a library of 16 commercial supplements and industrially-relevant surfactants containing  
288 more than 60 unique components and screened their individual effect on biomass accumulation  
289 after 24 hours. In this way, we reasoned we could efficiently identify critical classes of  
290 components related to the phenotype of interest and potentially deconvolve specific individual  
291 additives of interest by inference. We used the recommended concentrations of each  
292 supplement as supplied in product information, or critical micelle concentrations, and prior  
293 knowledge for broad classes in yeast media to set reasonable screening concentrations  
294 (Supporting Information). We identified five beneficial and two detrimental supplements that  
295 significantly impacted biomass accumulation ( $p_{\text{adj}} < 0.02$ ; 1-way-ANOVA) (**Figure 2F**). In  
296 general, the results suggest that supplementation with amino acids and trace metals were  
297 beneficial for accumulating biomass, while two surfactants, Tween 20 and CHAPS, were  
298 detrimental. For this phenotype, the effects of vitamin and lipid supplements were minor;  
299 supplements from either supplement category were not significantly beneficial or detrimental to  
300 biomass accumulation. Our earlier experiments suggest that vitamins are essential but  
301 concentration agnostic (**Figure 1E**), while lipid supplementation provides no clear benefit for  
302 biomass accumulation.

303         Based on these results, we chose to test whether combinations of supplements of amino  
304 acids and trace salts could yield synergistic improvements in biomass accumulation. We  
305 screened pairwise combinations of the five beneficial supplements of mixed composition and  
306 ranked the performance of our supplementation strategies (**Figure 2G**). A combination of 1x  
307 MEM amino acids with 0.1 v/v% PTM1 salts resulted in the highest yield of biomass, though we  
308 observed strong performance from other combinations of amino acid and trace metal  
309 supplements. Based on these data, we chose to add MEM amino acids and PTM1 salts in our  
310 basal medium and optimized their concentrations (**Figure 2H**).

311           Based on these results, we elected 0.1 v/v% PTM1 salts and 1x MEM amino acids, in  
312 order to balance the moderate benefits and potentially high costs of amino acids. We found,  
313 however, that the inclusion of the PTM1 salts in liter-scale preparations produced fine  
314 precipitates, which can impede sterile transfers in use. To overcome this challenge, we  
315 screened a broad range of PTM1 salts concentrations to identify the minimum concentration  
316 required for improved outgrowth performance (**Figure 2I**). We found that PTM1 addition at  
317 concentrations as low as 0.0005 v/v% led to increased biomass accumulation. We therefore  
318 revised our PTM1 salts concentration to 0.01 v/v%, a concentration high enough to obtain the  
319 benefits of PTM1 supplementation without inducing precipitate formation. This formulation we  
320 named DM1.

321           Completing this series of optimizations with our iterative modular approach to define a  
322 new formulation of medium, we then compared with other common media used to grow *P.*  
323 *pastoris*. We evaluated the performance of this new optimized medium (DM1) relative to the  
324 unsupplemented basal medium (DM1\_dev0), the rich defined medium (RDM) we had previously  
325 developed, and a common medium 4 v/v% glycerol BMGY. We found that DM1 yielded the  
326 highest biomass accumulation, with significantly higher biomass accumulation relative to RDM  
327 and BMGY (**Figure 2J**). This result demonstrates the utility of our modular strategy here for  
328 media development that yielded an improved formulation for biomass accumulation compared  
329 to other common media with minimal time and labor investment, and without requiring complex  
330 analytical methods like mass spectrometry or RNA-sequencing.

331

332 *Identifying media conditions important to heterologous protein production in K. phaffii*

333           In addition to the time and labor savings of modular media development, our proof-of-  
334 concept experiments demonstrated that this approach creates a flexible medium that can be  
335 rapidly adapted to new growth phenotypes, as well as a data package that identifies media  
336 conditions important to the phenotype of interest. We reasoned that these additional benefits

337 could be particularly relevant for optimizing production of heterologous proteins. Understanding  
338 which media components contribute most significantly to productivity could improve culture  
339 performance and help identify important metabolic pathways or physiological effects for further  
340 study.

341 To develop a medium for improved production of a recombinant protein, we chose to use  
342 a strain engineered to secrete a rotavirus-derived subunit vaccine component, VP4-P[8], as a  
343 model protein. We have previously demonstrated that this viral antigen can be expressed at  
344 high titer under the control of the methanol-inducible pAOX1 promoter in BMMY media (Dalvie  
345 et al., 2020). Similar to our initial approach to optimize a medium for growing biomass, we first  
346 determined and optimized the concentrations of the sources for carbon and nitrogen, along with  
347 the pH. The expression of P[8] in the strain tested uses the methanol-dependent pAOX1  
348 promoter for inducible expression, so we selected methanol as the initial carbon source. We  
349 then examined the impact of the source of nitrogen and buffer pH on titer. We conducted a full-  
350 factorial DOE using identical concentrations as those used to create a medium for accumulating  
351 biomass. The resulting model was visualized by ranking combinations of sources of nitrogen  
352 and buffer (**Figure 3A**). The effects showed no interaction between these two factors. Urea was  
353 again identified as the preferred source of nitrogen while higher pH values led to improved  
354 secreted P[8] productivity. Unlike biomass accumulation, this pH dependence was observed  
355 across both nitrogen sources.

356 We next applied the same DOE to identify important concentration-dependent  
357 interactions that impact the production of P[8]. Unsurprisingly, the concentration of methanol  
358 was the most important factor, with possible minor effects from other components (**Figure 3B**).  
359 We decided to screen further a 20-fold range in methanol concentrations using two formulations  
360 for remaining media components—the one determined for optimal cell growth (DM1) and the  
361 optimal base media formulation predicted by the quadratic model here (2x YNB, 1 g/L urea, 4  
362 g/L potassium phosphate adjusted to a pH of 6.5). We found that production was relatively

363 insensitive for concentrations of methanol ranging from 1-4 v/v%, with an optimum around 2%  
364 (**Figure 3C**). We postulated that the rapid decline in productivity observed in these milliliter-  
365 scale cultures using concentrations >6 v/v% methanol was likely due to excess formation of  
366 toxic metabolic byproducts such as formaldehyde and hydrogen peroxide (Wakayama et al.,  
367 2016). Interestingly, the predicted optimal medium from this set of studies outperformed the  
368 medium we determined for accumulating biomass, suggesting that certain components of the  
369 basal medium may benefit protein expression more than cellular growth and underscores the  
370 value of optimizing media for specific phenotypes of interest. Based on these data in total, we  
371 defined a basal medium for production including 2x YNB, 2 v/v% methanol, 1 g/L urea, and 4  
372 g/L potassium phosphate buffer adjusted to a pH of 6.5 (DM2\_dev0).

373         Next, we examined which supplements could improve the performance of DM2\_dev0.  
374 We added three chemical chaperones (TUDCA, sodium deoxycholate monohydrate (SDM), and  
375 valproic acid) (Kuryatov, Mukherjee, & Lindstrom, 2013; Uppala, Gani, & Ramaiah, 2017), two  
376 antioxidants (reduced glutathione (GSH) and N-acetyl cysteine (NAC)), and the chelator, K-  
377 ETDA, to the list of 16 supplements included in our original screen defined for biomass  
378 accumulation. Concentrations for these components were chosen based on product  
379 specifications, literature data, and prior experience (Supporting Information). Many of the 22  
380 supplements screened improved production of P[8] (**Figure 3D**). The top four ranking  
381 supplements comprised surfactants or lipids, which could modulate membrane fluidity and lipid  
382 metabolism (Butler, Huzel, Barnab, Gray, & Bajno, 1999; Degreif, Cucu, Budin, Thiel, & Bertl,  
383 2019; Ritacco, Frank V; Yongqi Wu, 2018).

384         We then screened combinations of lipid supplements and surfactants to identify potential  
385 synergistic effects. We ranked the individual supplements and their combinations (**Figure 3E**)  
386 according to the measured titers of P[8]. We found that the addition of a cholesterol-rich  
387 supplement yielded the highest secreted titers of P[8] (~50% improvement compared with  
388 supplement-free condition in initial screens). Interestingly, a synthetic cholesterol supplement

389 alone did not substantially improve performance, suggesting the benefit results from a  
390 combination of fatty acids and surfactant components in the supplement (**Supporting**  
391 **Information**). This conclusion is consistent with similar improvements observed from other  
392 supplements, such as linoleic acid-oleic acid-albumin (**Figure 3D**).

393 Since no other synergistic effects were observed in the combination screen, we  
394 assessed the dependence of titer on the concentration of the cholesterol-containing supplement  
395 identified (**Figure 3F**). Similar to our observations with cellular YNB used in the outgrowth  
396 media, we found that concentrations of the supplement as low as 0.2 v/v% were beneficial for  
397 protein expression, but that production was relatively insensitive to concentration (**Figures 3F,**  
398 **3G**). We then directly compared the supplemented medium to the original composition; the new  
399 supplemented media provided a 25% improvement in titer ( $p = 0.0006$ , one-tailed Welch's T  
400 test). This new formulation with 1x cholesterol supplement, which we named DM2\_dev1, was  
401 the result of one cycle of optimization using our method.

402 Components of the cholesterol supplement included fatty acids, cholesterol, and  
403 cyclodextrin, which are all are known to modulate membrane fluidity, a key parameter in vesicle  
404 trafficking (Cooper, 1978; Degreif et al., 2019; Mahammad & Parmryd, 2015). We reasoned that  
405 the addition of this supplement could therefore have synergistic effects with other supplements,  
406 but did not find any further supplementation that improved P[8] titers within our original screen  
407 (**Figure 3H**). We, therefore, considered if there could be additional classes of beneficial  
408 supplements, absent from the original screen. Previous experiments demonstrated that P[8]  
409 productivity is highly sensitive to methanol concentration (**Figure 3C**), so we wondered whether  
410 further modulation of central carbon metabolism could yield additional productivity gains.

411 Modification of central carbon metabolism is best accomplished by feeding cells  
412 alternative carbon sources, either entirely or as co-feeding substrates. Four co-fed substrates  
413 have previously been shown to be non-repressive of pAOX1: sorbitol, mannitol, trehalose, and  
414 alanine (Inan & Meagher, 2001). These substrates can be co-utilized with methanol without



415 repressing the pAOX1 promoter, which controls expression of P[8]. We hypothesized that the  
416 introduction of supplemental carbon sources could enable further optimization of central carbon  
417 metabolism. We screened co-fed substrates individually and in 1:1 combinations at a total  
418 concentration of 20 g/L (a concentration similar to the optimal fructose and methanol  
419 concentrations observed in previous carbon source optimizations) (**Figure 2E,3C**). Sorbitol co-  
420 feeding had the most beneficial effect, resulting in a ~80% increase in P[8] titer (**Figure 3I**).  
421 Mannitol supplementation was also beneficial (~70% increase), while alanine and trehalose co-  
422 feeding were detrimental to productivity. While co-feeding carbon sources led to increased  
423 biomass yield during production, these differences did not account for the improved titer, as  
424 improvements in specific productivity ( $q_p$ ) of ~60% and ~45% were also observed for the sorbitol  
425 and mannitol co-fed conditions, respectively (**Supporting Information**). Based on these data,  
426 we chose to include sorbitol as a supplemental carbon source for further study.

427         The addition of a supplemental carbon source could significantly impact central carbon  
428 metabolism. We, therefore, wondered how the inclusion of sorbitol might impact the optimal  
429 carbon feeding strategy. Examining total carbon source concentrations from 20 – 70 g/L, we  
430 compared the performance of cultures co-fed with sorbitol:methanol ratios of 3:1, 1:1, and 1:3 to  
431 a methanol-only control (**Figure 3J**). All co-fed conditions outperformed the methanol-only  
432 control, suggesting that the presence of sorbitol is highly beneficial for producing P[8]. The titer  
433 was relatively insensitive to sorbitol:methanol ratios and carbon concentrations. Based on the  
434 data, we decided to use 2 v/v% methanol and 20 g/L of sorbitol for the final sorbitol-  
435 supplemented media named DM2.

436         Finally, we compared the P[8] titer obtained using DM2\_dev0, DM2\_dev1, and DM2 to  
437 other common production media for *P. pastoris*: BMMY and RDM. We found that DM2 led to a  
438 ~2x improvement in P[8] titers, relative to BMMY and RDM, up to  $97 \pm 2$  mg/L.

439

440 **Discussion**

441 Here we have implemented a novel and broadly applicable approach for media  
442 development that relies on rapid, automated construction of diverse media from defined  
443 modules of components. We demonstrated the utility of this approach by developing two new  
444 media for two phenotypes of interest in the heterologous production of proteins by yeast,  
445 namely biomass accumulation and secreted production. We systematically identified and  
446 optimized the concentration of media components important to each phenotype of interest.  
447 Importantly, defining these new formulations of media did not require advanced analytical  
448 capabilities and required minimal experimental time to assess more than 360 total formulations  
449 during two to three rounds of optimization for each.

450 Our optimized formulations affirmed the importance of lipid-related components for  
451 maximizing titers in *Pichia pastoris* cultivations. The importance of optimizing membrane fluidity  
452 or lipid metabolism has been well established in CHO and appears to be key to optimizing  
453 heterologous protein secretion in *P. pastoris* cultivation as well (Clincke et al., n.d.; Ritacco et  
454 al., 2018; Zhang, Wang, & Liu, 2013).

455 Modular media blending has four advantages over existing methods. First, the use of  
456 common stock solutions and supplements to formulate media reduces initial labor required for  
457 new experiments or optimizations ~15 minutes per experiment, making parallel testing of  
458 multiple hypotheses efficient and requires less resources overall. Here, we created 30 stock  
459 solutions, and evaluated >360 unique media compositions, without manual preparation of  
460 individual media or extensive blending calculations or planning. Most of these solutions could be  
461 readily reused in future experiments to optimize for new phenotypes of interest. Second, our  
462 method requires minimal knowledge of the host organism *a priori* and could, in principle, be  
463 applied to any measurable phenotype of interest. We anticipate that this method could be used  
464 to optimize other phenotypes of interest, such as glycosylation profiles. Third, our method  
465 provides certain practical advantages, including minimal requirements for analytical  
466 characterization and rapid identification of component interactions that lead to solubility

467 challenges. These traits make it possible to learn about formulations that may lead to extensive  
468 precipitates like those encountered with our rich defined medium formulation (**Figure 4A**).  
469 Finally, modularly constructed media, such as DM2, can be ~70% pure water with low  
470 osmolarity, leaving volumetric and osmotic space for future modifications to accommodate new  
471 or related phenotypes of interest (**Figure 4B**).

472 We also acknowledge certain limitations in the present study that may be addressed in  
473 future work. First, while modular media development identifies components key to the  
474 optimization of the phenotype of interest, additional media optimization effort may be necessary  
475 to translate these learning in batch cultivations to scaled-up fed-batch or perfusion operation,  
476 where additional variables such as supplemental feed composition and feeding schedule must  
477 also be considered. In principle, modular media construction could be applied to high-  
478 throughput scale-down cultivation models, such as Ambr250s. Second, our approach for  
479 optimization relies on greedy algorithms tailored to create a new media for a single phenotype of  
480 interest; however, given the vast explorable media space it is possible to find a local optimum.  
481 Further metabolic or -omic modeling techniques could be employed to guide broader exploration  
482 of media space, co-optimize multiple phenotypes, or facilitate biologically informed optimization,  
483 albeit with more complex experimental and computational requirements (Matthews, Kuo, Love,  
484 & Love, 2017b; Mohmad-Saberi et al., 2013). Third, our current method used commercially  
485 available supplements, but in practice, beneficial supplements could be simplified by using  
486 individual components, to facilitate more biological inferences and aid development of improved  
487 host-specific supplements. Finally, initial screens to identify beneficial supplements rely on  
488 reasonable choices of initial concentrations for screening. These currently require prior  
489 knowledge from the literature or commercial sources; with further use in the community of the  
490 Openblend approach, it is possible additional sharing of knowledge could help inform further  
491 developments.

492           The improved speed and accessibility of in-depth media development experiments  
493 enabled by modular media construction could help improve expression of many classes of  
494 proteins in laboratories and discovery centers that have not traditionally had access to such  
495 capabilities. Since many lead candidates for new therapeutic proteins begin in small biotech  
496 firms and academic labs, early-stage improvements in productivity could help advance more  
497 proteins towards the clinic simply by facilitating access to larger quantities of proteins for initial  
498 research and non-clinical studies. In more established companies, the ability to make rapid  
499 improvements to existing media may enable faster product development timelines and could  
500 reduce manufacturing costs overall. Rapid identification and optimization of sensitive media  
501 components could also enable easier adoption of a range of industrially relevant alternative  
502 hosts, resulting in further manufacturing flexibility and potentially cost savings (Coleman, 2020).

503

#### 504 **Acknowledgements**

505           The authors acknowledge Danielle Camp for program coordination. This work was  
506 funded by the Bill & Melinda Gates Foundation (Investment ID INV-002740). The content is  
507 solely the responsibility of the authors and does not necessarily represent the official views of  
508 the Bill & Melinda Gates Foundation.

509           A.M.B., I.R.G., K.R.L., and J.C.L. conceived and planned experiments. A.M.B.  
510 conducted media development experiments. S.R.A. developed and maintained the RP-UPLC  
511 assay. A.M.B. performed analytical characterization. A.M.B., K.R.L., and J.C.L. wrote the  
512 manuscript. J.C.L. and K.R.L. designed the experimental strategy and supervised analysis. All  
513 authors reviewed the manuscript.

514

515

## 516 References

- 517
- 518 Butler, M., Huzel, N., Barnab, N., Gray, T., & Bajno, L. (1999). Linoleic acid improves the  
519 robustness of cells in agitated cultures, 27–36.
- 520 Clincke, M.-F., Guedon, E., Yen, F. T., Ea, L., Universite, N., Ogier, V., ... Goergen, J.-L. (n.d.).  
521 Effect of Surfactant Pluronic F-68 on CHO Cell Growth , Metabolism , Production , and  
522 Glycosylation of Human Recombinant IFN- c in Mild Operating Conditions, 181–190.  
523 <https://doi.org/10.1002/btpr.503>
- 524 Coleman, E. (2020). Establishment of a Novel Pichia Pastoris Host Production Platform by.  
525 Combs, G. F. (2012). *The vitamins: Fundamental aspects in nutrition and health*. San Diego:  
526 Elsevier Academic Press.
- 527 Cooper, R. A. (1978). Influence of Increased Membrane Cholesterol on Membrane Fluidity and  
528 Cell Function in Human Red Blood Cells. *Journal of Supramolecular Structure*.
- 529 Crowell, L. E., Crowell, L. E., Raymond, A., St, H. E., Engineering, C., Doyle, P. S., & Crowell,  
530 L. E. (2020). Accelerating process development for biologics on an automated , pharmacy-  
531 scale manufacturing system by by.
- 532 Dalvie, N. C., Brady, J. R., Crowell, L. E., Tracey, M. K., Biedermann, A. M., Kaur, K., ... Love,  
533 J. C. (2020). Molecular engineering improves antigen quality and enables integrated  
534 manufacturing of a trivalent subunit vaccine candidate for rotavirus. *BioRx*, 1–51.
- 535 Degreif, D., Cucu, B., Budin, I., Thiel, G., & Bertl, A. (2019). Lipid determinants of endocytosis  
536 and exocytosis in budding yeast. *BBA - Molecular and Cell Biology of Lipids*, 1864(7),  
537 1005–1016. <https://doi.org/10.1016/j.bbalip.2019.03.007>
- 538 FSA Panel on Additives and Products or Substances used in Animal Feed (FEEDAP). (2011).  
539 Scientific Opinion on safety and efficacy of choline chloride as a feed additive for all animal  
540 species. *EFSA Journal*, 9(9), 2353.
- 541 Gagnon, M., Hiller, G., Luan, Y. T., Kittredge, A., Defelice, J., & Drapeau, D. (2011). High-End  
542 pH-controlled delivery of glucose effectively suppresses lactate accumulation in CHO Fed-  
543 batch cultures. *Biotechnology and Bioengineering*, 108(6), 1328–1337.  
544 <https://doi.org/10.1002/bit.23072>
- 545 Galbraith, S. C., Bhatia, H., Liu, H., & Yoon, S. (2018). Media formulation optimization: current  
546 and future opportunities. *Current Opinion in Chemical Engineering*, 22, 42–47.  
547 <https://doi.org/10.1016/j.coche.2018.08.004>
- 548 Guo, C., Huang, Y., Zheng, H., Tang, L., He, J., Xiang, L., ... Jiang, H. (2012). Secretion and  
549 activity of antimicrobial peptide cecropin D expressed in Pichia pastoris. *Experimental and  
550 Therapeutic Medicine*, 1063–1068. <https://doi.org/10.3892/etm.2012.719>
- 551 Inan, M., & Meagher, M. M. (2001). Non-repressing carbon sources for alcohol oxidase (AOX1)  
552 Promoter of Pichia pastoris, 92(6), 585–589.
- 553 Jordan, M., Voisard, D., Berthoud, A., & Tercier, L. (2013). Cell culture medium improvement by  
554 rigorous shuffling of components using media blending, 31–40.  
555 <https://doi.org/10.1007/s10616-012-9462-1>
- 556 Kennedy, M., & Krouse, D. (1999). Strategies for improving fermentation medium performance:  
557 a review. *Journal of Industrial Microbiology and Biotechnology*, (23), 456–475.
- 558 Kuryatov, A., Mukherjee, J., & Lindstrom, J. (2013). Chemical Chaperones Exceed the  
559 Chaperone Effects of RIC-3 in Promoting Assembly of Functional a 7 AChRs. *PLoS ONE*,  
560 8(4), 1–11. <https://doi.org/10.1371/journal.pone.0062246>
- 561 Loebrich, S., Clark, E., Ladd, K., Takahashi, S., Brousseau, A., Kitchener, S., ... Ryll, T. (2019).  
562 Comprehensive manipulation of glycosylation profiles across development scales. *MAbs*,  
563 11(2), 335–349. <https://doi.org/10.1080/19420862.2018.1527665>
- 564 Love, J. C., Love, K. R., & Barone, P. W. (2012). Enabling global access to high-quality  
565 biopharmaceuticals. *Current Opinion in Chemical Engineering*, 2(4), 383–390.  
566 <https://doi.org/10.1016/j.coche.2013.09.002>

- 567 Lu, T. L., Pugach, O., Somerville, R., Rosenberg, S. A., Kochenderfer, J. N., Better, M., &  
568 Feldman, S. A. (2016). A Rapid Cell Expansion Process for Production of Engineered  
569 Autologous CAR-T Cell Therapies. *Human Gene Therapy Methods*, 27(6), 209–219.  
570 <https://doi.org/10.1089/hgtb.2016.120>
- 571 Mahammad, S., & Parmryd, I. (2015). Cholesterol depletion using methyl- $\beta$ -cyclodextrin. In  
572 *Methods in membrane lipids* (pp. 91–102).
- 573 Matthews, C. B., Kuo, A., Love, K. R., & Love, J. C. (2017a). Development of a general defined  
574 medium for *Pichia pastoris*, (July), 103–113. <https://doi.org/10.1002/bit.26440>
- 575 Matthews, C. B., Kuo, A., Love, K. R., & Love, J. C. (2017b). Development of a general defined  
576 medium for *Pichia pastoris*, (July), 103–113. <https://doi.org/10.1002/bit.26440>
- 577 McGillicuddy, N., Floris, P., Albrecht, S., & Bones, J. (2018). Examining the sources of variability  
578 in cell culture media used for biopharmaceutical production. *Biotechnology Letters*, 40(1),  
579 5–21. <https://doi.org/10.1007/s10529-017-2437-8>
- 580 Mohmad-Saberi, S. E., Hashim, Y. Z. H. Y., Mel, M., Amid, A., Ahmad-Raus, R., & Packer-  
581 Mohamed, V. (2013). Metabolomics profiling of extracellular metabolites in CHO-K1 cells  
582 cultured in different types of growth media. *Cytotechnology*, 65(4), 577–586.  
583 <https://doi.org/10.1007/s10616-012-9508-4>
- 584 Moser, J. W., Prielhofer, R., Gerner, S. M., Graf, A. B., Wilson, I. B. H., Mattanovich, D., &  
585 Dragosits, M. (2017). Implications of evolutionary engineering for growth and recombinant  
586 protein production in methanol - based growth media in the yeast *Pichia pastoris*. *Microbial*  
587 *Cell Factories*, 1–16. <https://doi.org/10.1186/s12934-017-0661-5>
- 588 Pereira, S., Kildegaard, H. F., & Andersen, M. R. (2018). Impact of CHO Metabolism on Cell  
589 Growth and Protein Production: An Overview of Toxic and Inhibiting Metabolites and  
590 Nutrients. *Biotechnology Journal*, 13(3), 1–13. <https://doi.org/10.1002/biot.201700499>
- 591 Ritacco, Frank V; Yongqi Wu, A. K. (2018). Cell Culture Media for Recombinant Protein  
592 Expression in Chinese Hamster Ovary ( CHO ) Cells : History , Key Components , and  
593 Optimization Strategies. <https://doi.org/10.1002/btpr.2706>
- 594 Ritacco, F. V., Wu, Y., & Khetan, A. (2018). Cell culture media for recombinant protein  
595 expression in Chinese hamster ovary (CHO) cells: History, key components, and  
596 optimization strategies. *Biotechnology Progress*, 34(6), 1407–1426.  
597 <https://doi.org/10.1002/btpr.2706>
- 598 Rodrigues, M. E., Costa, A. R., Henriques, M., Azeredo, J., & Oliveira, R. (2012). Comparison of  
599 commercial serum-free media for CHO-K1 cell growth and monoclonal antibody  
600 production. *International Journal of Pharmaceutics*, 437(1–2), 303–305.  
601 <https://doi.org/10.1016/j.ijpharm.2012.08.002>
- 602 Rouiller, Y., Périlleux, A., Collet, N., Jordan, M., Stettler, M., & Broly, H. (2013). A high-  
603 throughput media design approach for high performance mammalian fed-batch cultures,  
604 (June), 501–511.
- 605 Schnellbaecher, A., Binder, D., Bellmaine, S., & Zimmer, A. (2019). Vitamins in cell culture  
606 media: Stability and stabilization strategies. *Biotechnology and Bioengineering*, 116(6),  
607 1537–1555. <https://doi.org/10.1002/bit.26942>
- 608 Sorkun, M. C., Khetan, A., & Er, S. (2019). AqSolDB , a curated reference set of aqueous  
609 solubility and 2D descriptors for a diverse set of compounds, 2019(July), 1–8.  
610 <https://doi.org/10.1038/s41597-019-0151-1>
- 611 Uppala, J. K., Gani, A. R., & Ramaiah, K. V. A. (2017). Chemical chaperone , TUDCA unlike  
612 PBA , mitigates protein aggregation efficiently and resists ER and non-ER stress induced  
613 HepG2 cell death. *Scientific*, 1(January), 1–13. [https://doi.org/10.1038/s41598-017-03940-](https://doi.org/10.1038/s41598-017-03940-1)  
614 1
- 615 Villadsen, J. (2015). Redox Balances and Consistency Check of Experiments. In *Fundamental*  
616 *Bioengineering* (pp. 17–38).
- 617 Wakayama, K., Yamaguchi, S., Takeuchi, A., Mizumura, T., Ozawa, S., Tomizuka, N., ...

- 618 Nakagawa, T. (2016). Regulation of intracellular formaldehyde toxicity during methanol  
619 metabolism of the methylotrophic yeast *Pichia methanolica*. *Journal of Bioscience and*  
620 *Bioengineering*, 122(5), 545–549. <https://doi.org/10.1016/j.jbiosc.2016.03.022>  
621 Yamamoto, T., & Ishihara, K. (n.d.). Stability of Glutathione in Solution. *Developments in Food*  
622 *Engineering*, 209–211.  
623 Zakharova, E. M., & Minashina, I. K. (2015). Review of Multidimensional Optimization Methods.  
624 *Mathematical Models, Computational Methods*, 60(6), 625–636.  
625 <https://doi.org/10.1134/S1064226915060194>  
626 Zhang, H., Wang, H., & Liu, M. (2013). Rational development of a serum-free medium and fed-  
627 batch process for a GS-CHO cell line expressing recombinant antibody, 363–378.  
628 <https://doi.org/10.1007/s10616-012-9488-4>  
629  
630

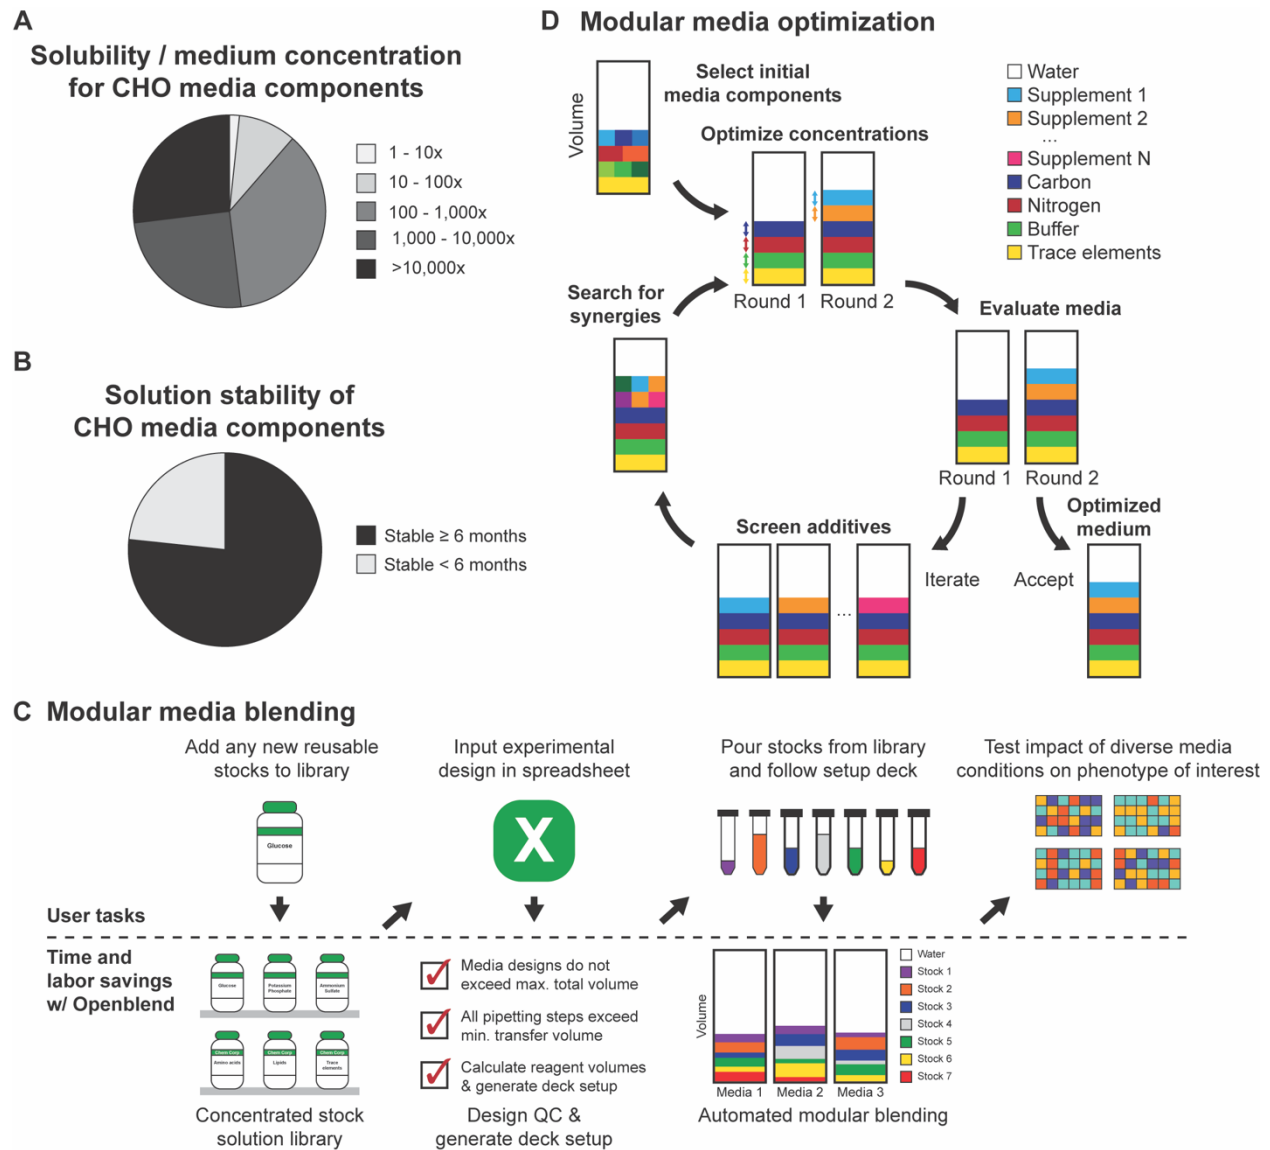

631

632 **Figure 1.** Modular media development can be broadly applicable, easily applied, and

633 systematically executed to improve measurable phenotypes of interest.

634 A) Estimate of the ratios of component solubility to their concentrations in medium demonstrates

635 that most components are soluble at >10x their concentration in the CHO medium, eRDF. B)

636 With the exception of some classes of medium components, such as vitamins, most media

637 components can be formulated into solutions that remain stable for >6 months under proper

638 storage conditions. C) Overview of time, labor and planning saved by using Openblend to

639 automate modular media construction. D) Overview of a modular media optimization approach,



640 which can be used to build an optimized medium for any measurable phenotype of interest

641 systematically.

642

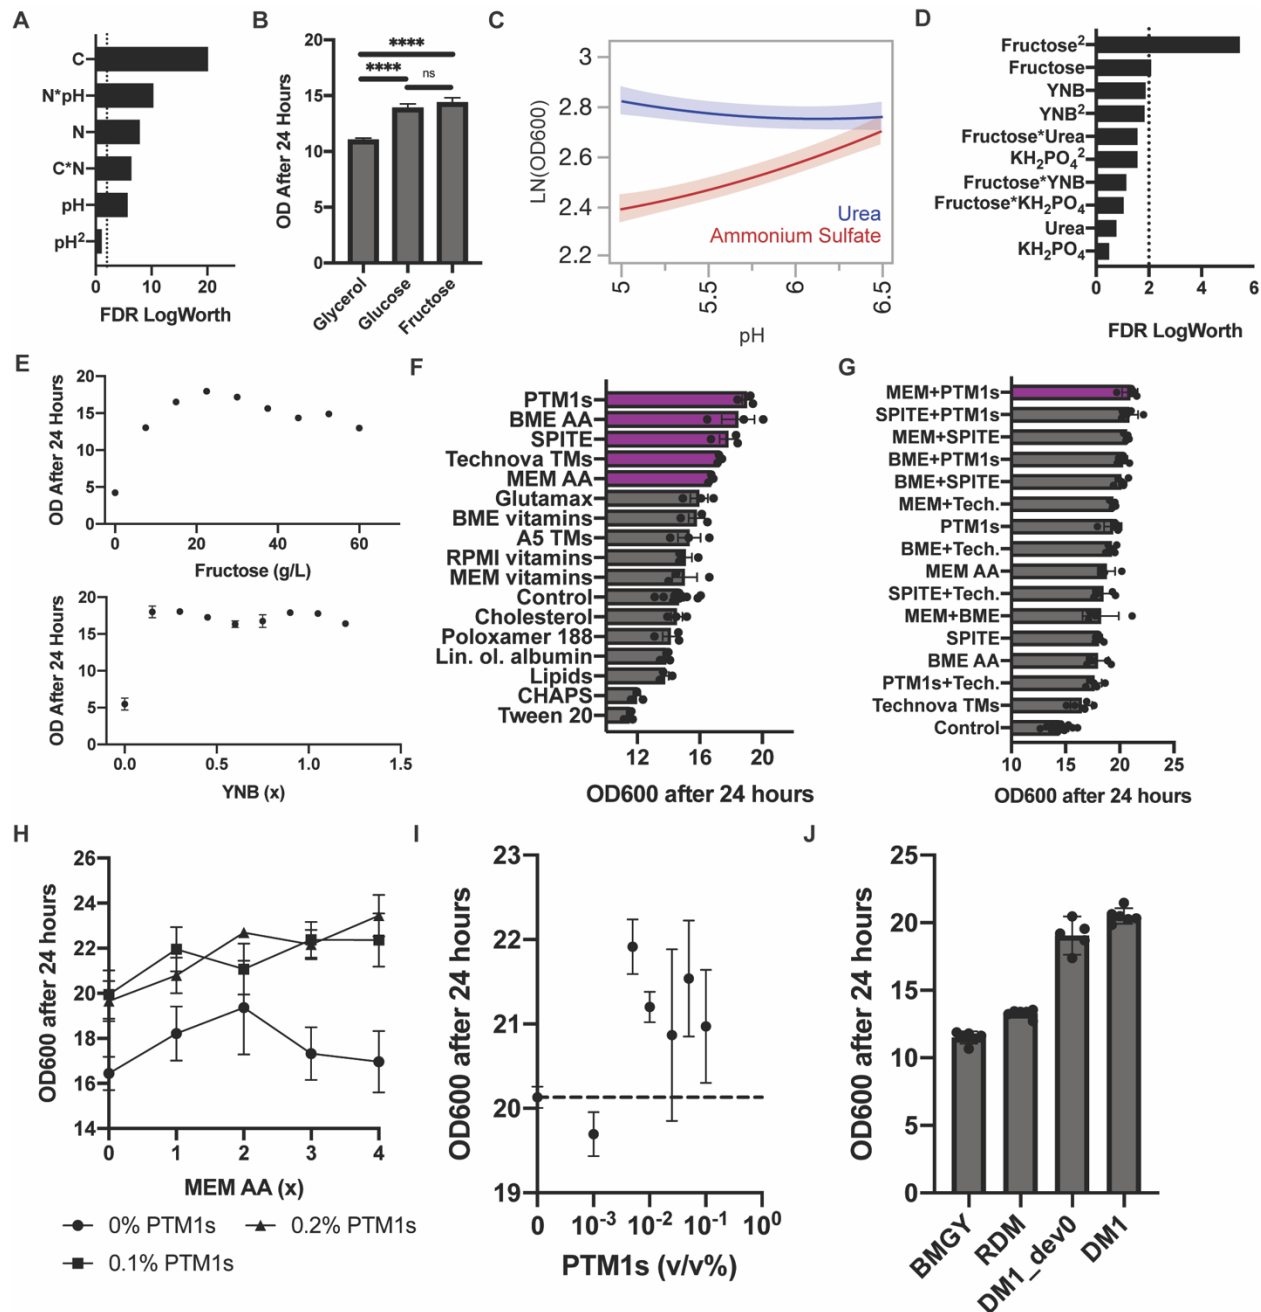

643

644 **Figure 2.** Modular development of a new biomass accumulation media for *P. pastoris*

645 A) Significance of carbon (fructose, glucose, glycerol), nitrogen (urea and ammonium sulfate),

646 and pH choice (5, 5.75, 6.5) in a least square regression model fitted to a full factorial DOE. B)

647 Fructose and glucose were found to result in significantly higher biomass accumulation after 24

648 hours of outgrowth than glycerol. C) Ammonium sulfate was found to be more pH sensitive than  
649 urea, as shown by the JMP sensitivity profiles during fructose feeding. D) Significance of terms  
650 in a least square regression model fitted to a full factorial DOE over fructose, urea, potassium  
651 phosphate, and YNB concentrations. E) 1-FAAT optimization of fructose and YNB concentration  
652 finds optimal outgrowth performance at a fructose concentration of 22.5 g/L and relative  
653 insensitivity over a wide range of YNB concentrations (0.15 to 1.2x). F) A media  
654 supplementation screen identified 5 beneficial supplements, related to trace element and amino  
655 acid supplementation. G) Further screening of beneficial supplement combinations identified  
656 synergistic amino acid and trace metal supplementation strategies. H) Comparison of the effect  
657 of MEM amino acid concentration on biomass accumulation at different PTM1 salts  
658 concentrations. I) Effect of the concentration of PTM1 salts on biomass accumulation in  
659 DM1\_dev0 medium supplemented with 1x MEM AA. J) Head-to-head comparison of 4 v/v%  
660 glycerol BMGY, 4 v/v% glycerol rich defined medium, the initial defined biomass accumulation  
661 media (DM1\_dev0), and the final biomass accumulation medium obtained after a full  
662 optimization cycle (DM1), demonstrates that DM1 leads to superior biomass accumulation.

663

664

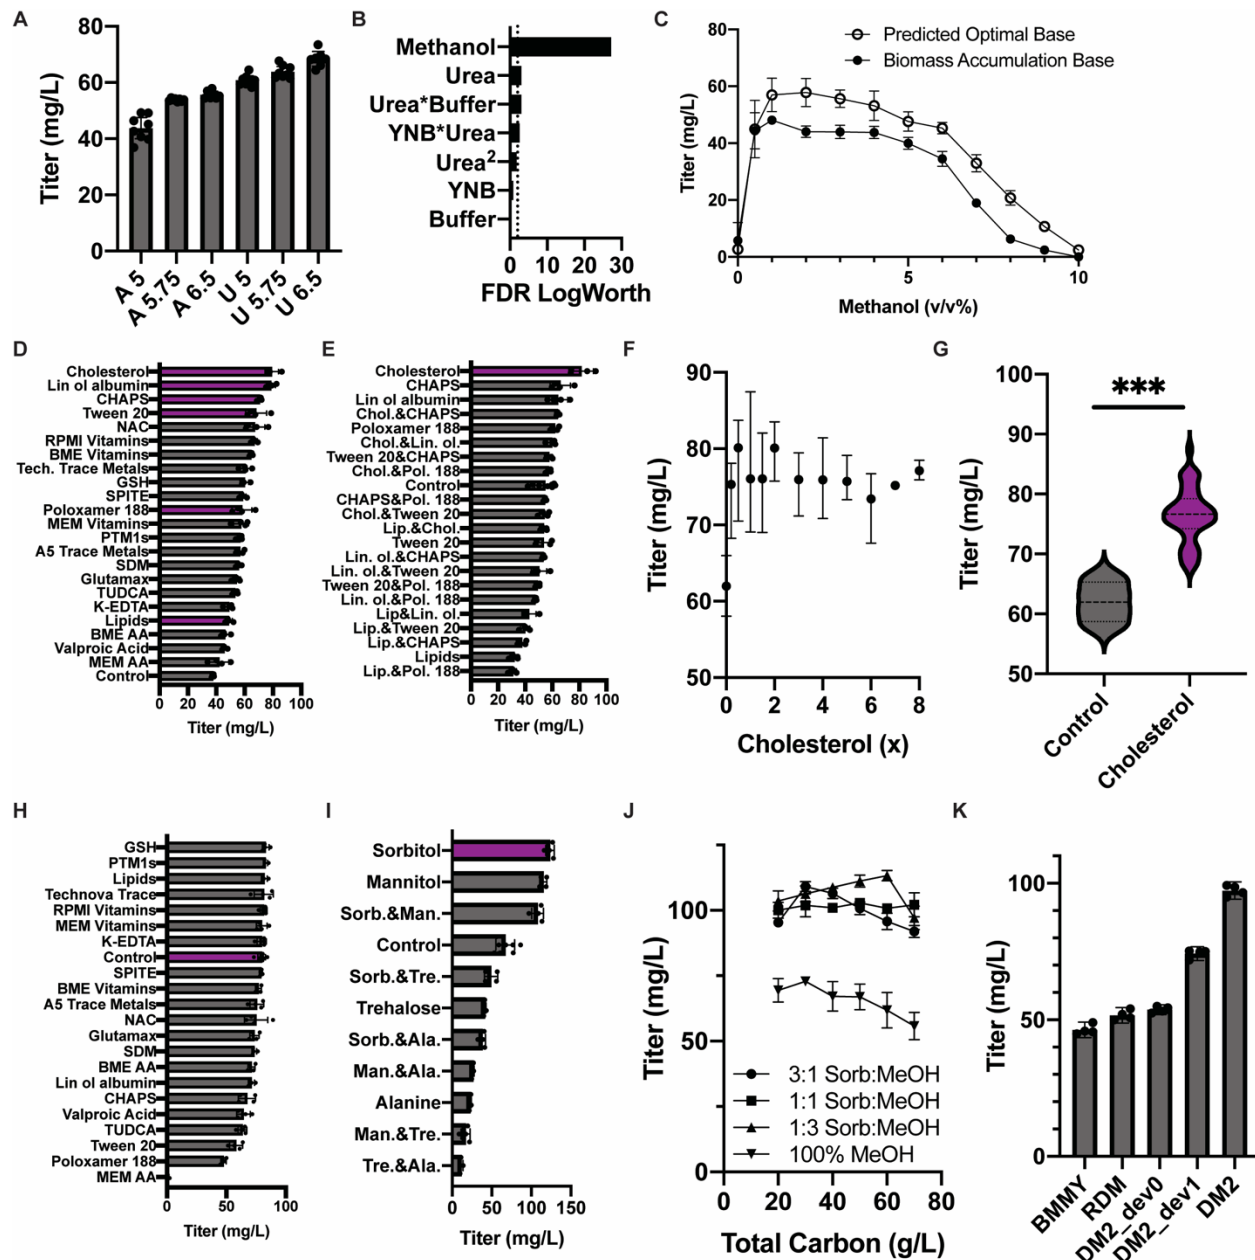

665

666 **Figure 3.** Modular development of a media for heterologous protein production in *P. pastoris*

667 A) Initial full-factorial screen of nitrogen source choice and buffer pH demonstrates that urea is

668 preferred over ammonium sulfates and high buffer pH is preferred over lower values. B) A full-

669 factorial concentration optimization identified methanol as the most concentration dependent

670 variable. Other components in the base media were predicted to affect productivity with much

671 lower levels of significance. C) Evaluation of the effect of methanol concentration on P[8] titer,

672 using two different base media (urea, buffer, and YNB concentrations): the biomass

673 accumulation base medium and the optimal base media composition predicted by our  
674 concentration DOE. D) Ranking of supplements according to their effect on P[8] titer.  
675 Supplements related to membrane fluidity or lipid metabolism ranked highly. E) Evaluation of  
676 combinations of lipid and surfactant supplements confirmed that cholesterol supplementation  
677 leads to the greatest improvement in P[8] titer. F) Concentration optimization of cholesterol  
678 demonstrated low concentration dependence, with similar performance observed over a 40-fold  
679 range (0.2-8x). G) Comparing cholesterol-free and cholesterol-supplemented cultures fed at  
680 various concentrations demonstrates that cholesterol supplementation results in a significant  
681 ~25% improvement in P[8] titers ( $p < 0.001$ ). H) No significantly beneficial supplements were  
682 observed when repeating the supplementation screen. I) Screening supplementation of 20 g/L  
683 of co-fed substrates individually or in 1:1 combinations by mass identified sorbitol  
684 supplementation as highly beneficial to P[8] titer. J) Examination of the effect of co-feed ratio  
685 and total carbon concentration on titer in DM2\_dev1 supplemented media. K) Comparison of  
686 P[8] titer obtained with DM2 to previous iterations and other common *P. pastoris* media  
687 demonstrates a ~2x improvement in P[8] titer, relative to 1 v/v% methanol RDM and 1 v/v%  
688 methanol BMMY.  
689

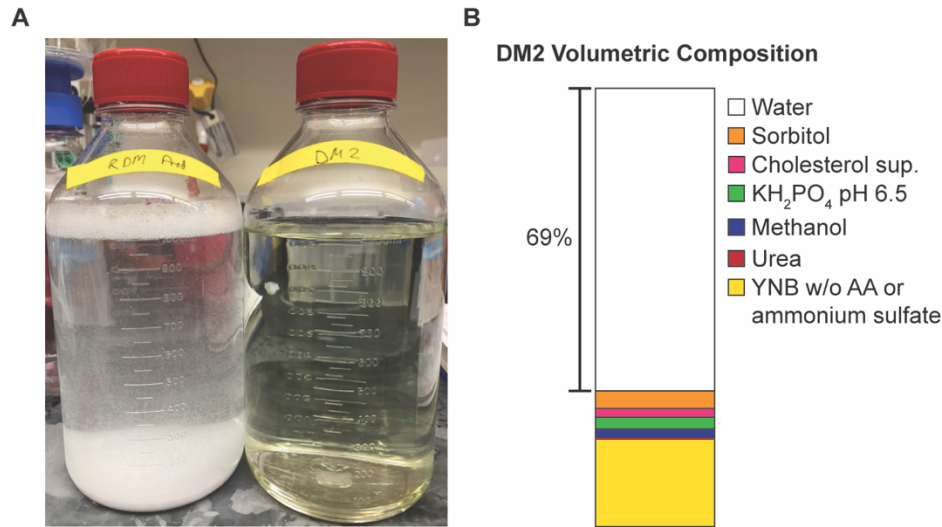

690

691 **Figure 4.** Comparison of DM2 to rich define medium.

692 A) Comparison of precipitate formation during construction of RDM (left) and DM2 (right) media.

693 Adjusting the pH of RDM to 6.5 results in significant formation of white precipitate. No

694 precipitate formation is observed in DM2. B) Relative volumes of stock solutions and pure water

695 needed to construct DM2. Pure water addition accounts for 69% of DM2 volume, demonstrating

696 that there is substantial room for further supplement exploration and development. When

697 separated into simple stock solutions, DM2 can be 3x concentrated.
